# Supplementary material for: The Cumulative Therapeutic Effect of Acupuncture Treatment in Patients with Migraine without Aura: Evidence from Dynamic Alterations of Intrinsic Brain Activity and Effective Connectivity Analysis
Source: Research Square preprint supplement (doi:10.21203/rs.3.rs-1055422/v2), 2022-01-12
Supplement: Supplementary file 1 [file 7f94c16830ba44929794f8d8.docx]

**Supplementary materials for**

“**The cumulative therapeutic effect of acupuncture treatment in patients with migraine without aura: Evidence from dynamic alterations of intrinsic brain activity and effective connectivity analysis**”

Yilei Chen1, Yingjie Kang1, Shilei Luo1, Shanshan Liu2, Bo Wang2, Zhigang Gong1, Yanwen Huang1, Hui Wang1, Wenli Tan1*, Songhua Zhan1*

1Department of Radiology, Shuguang Hospital Affiliated to Shanghai University of Traditional Chinese Medicine, Shanghai, China, 2Department of Acupuncture and Moxibustion, Shuguang Hospital Affiliated to Shanghai University of Traditional Chinese Medicine, Shanghai, China

***Corresponding authors:**

**Songhua Zhan:** songhuazhan＠sina.com; **Wenli Tan:** tanying2245@163.com

Department of Radiology, Shuguang Hospital Affiliated to Shanghai University of Traditional Chinese Medicine, Shanghai, China


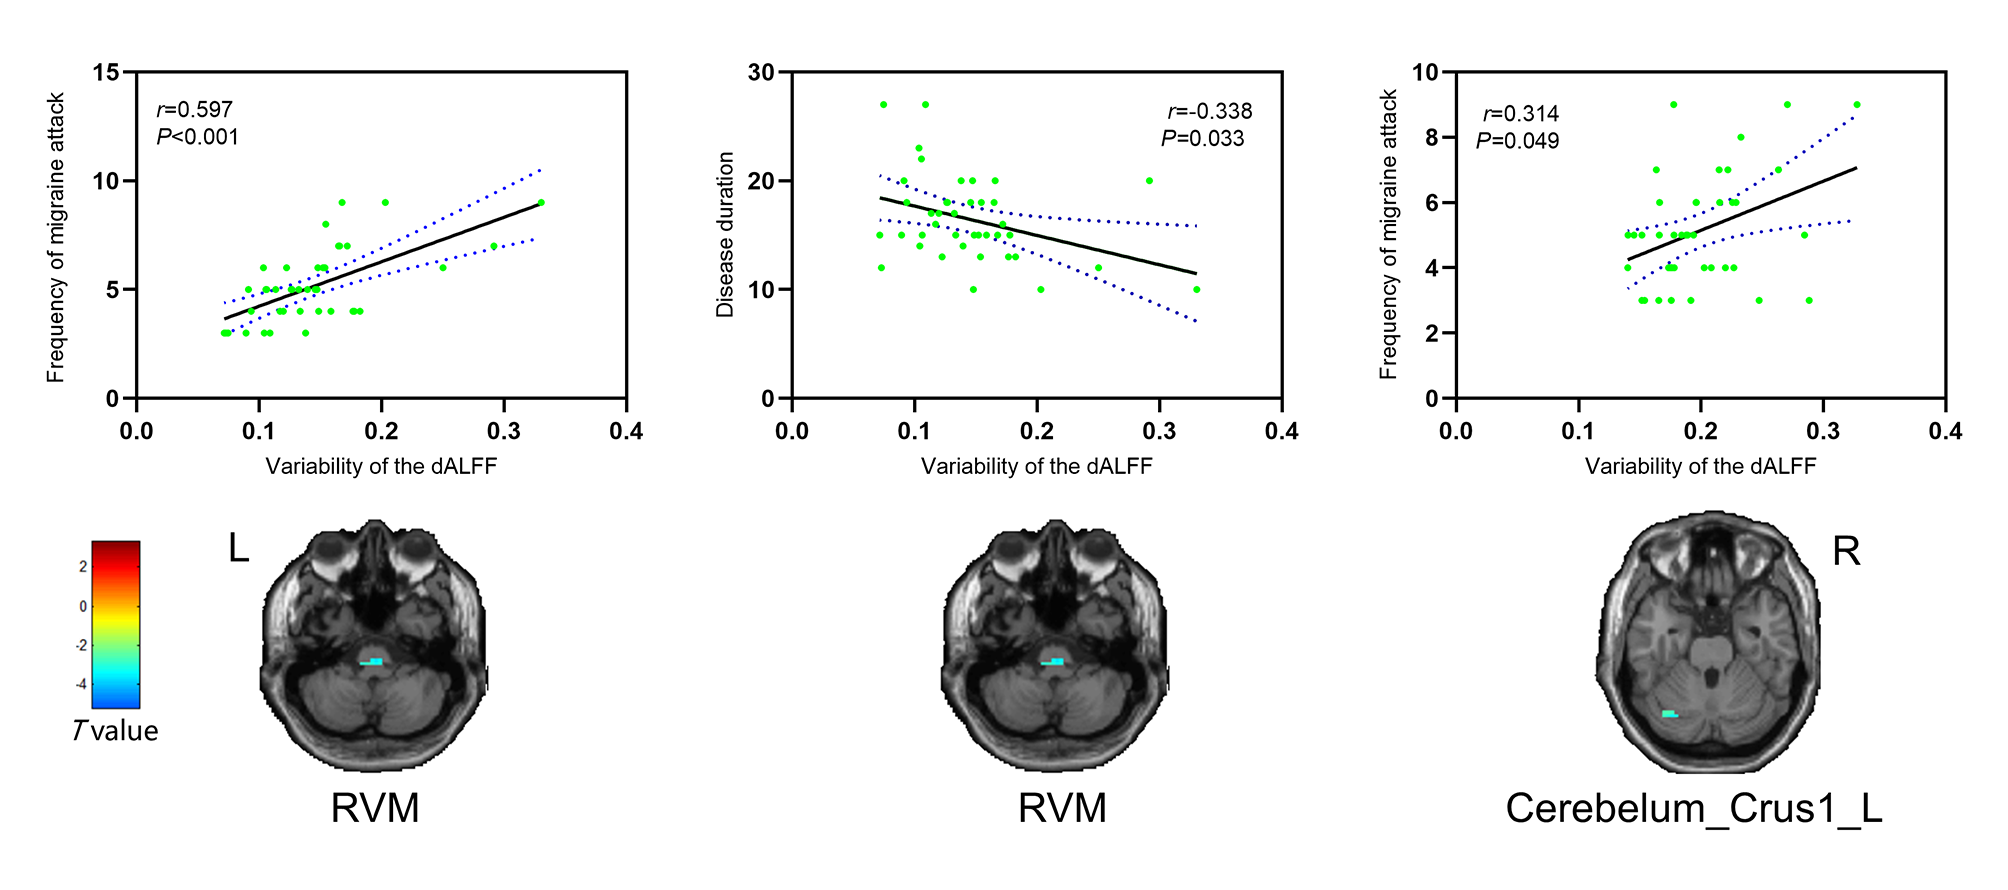


Fig. S1 The significant correlations between clinical variables and dALFF variability at baseline. All abbreviations are defined in the Abbreviations section.


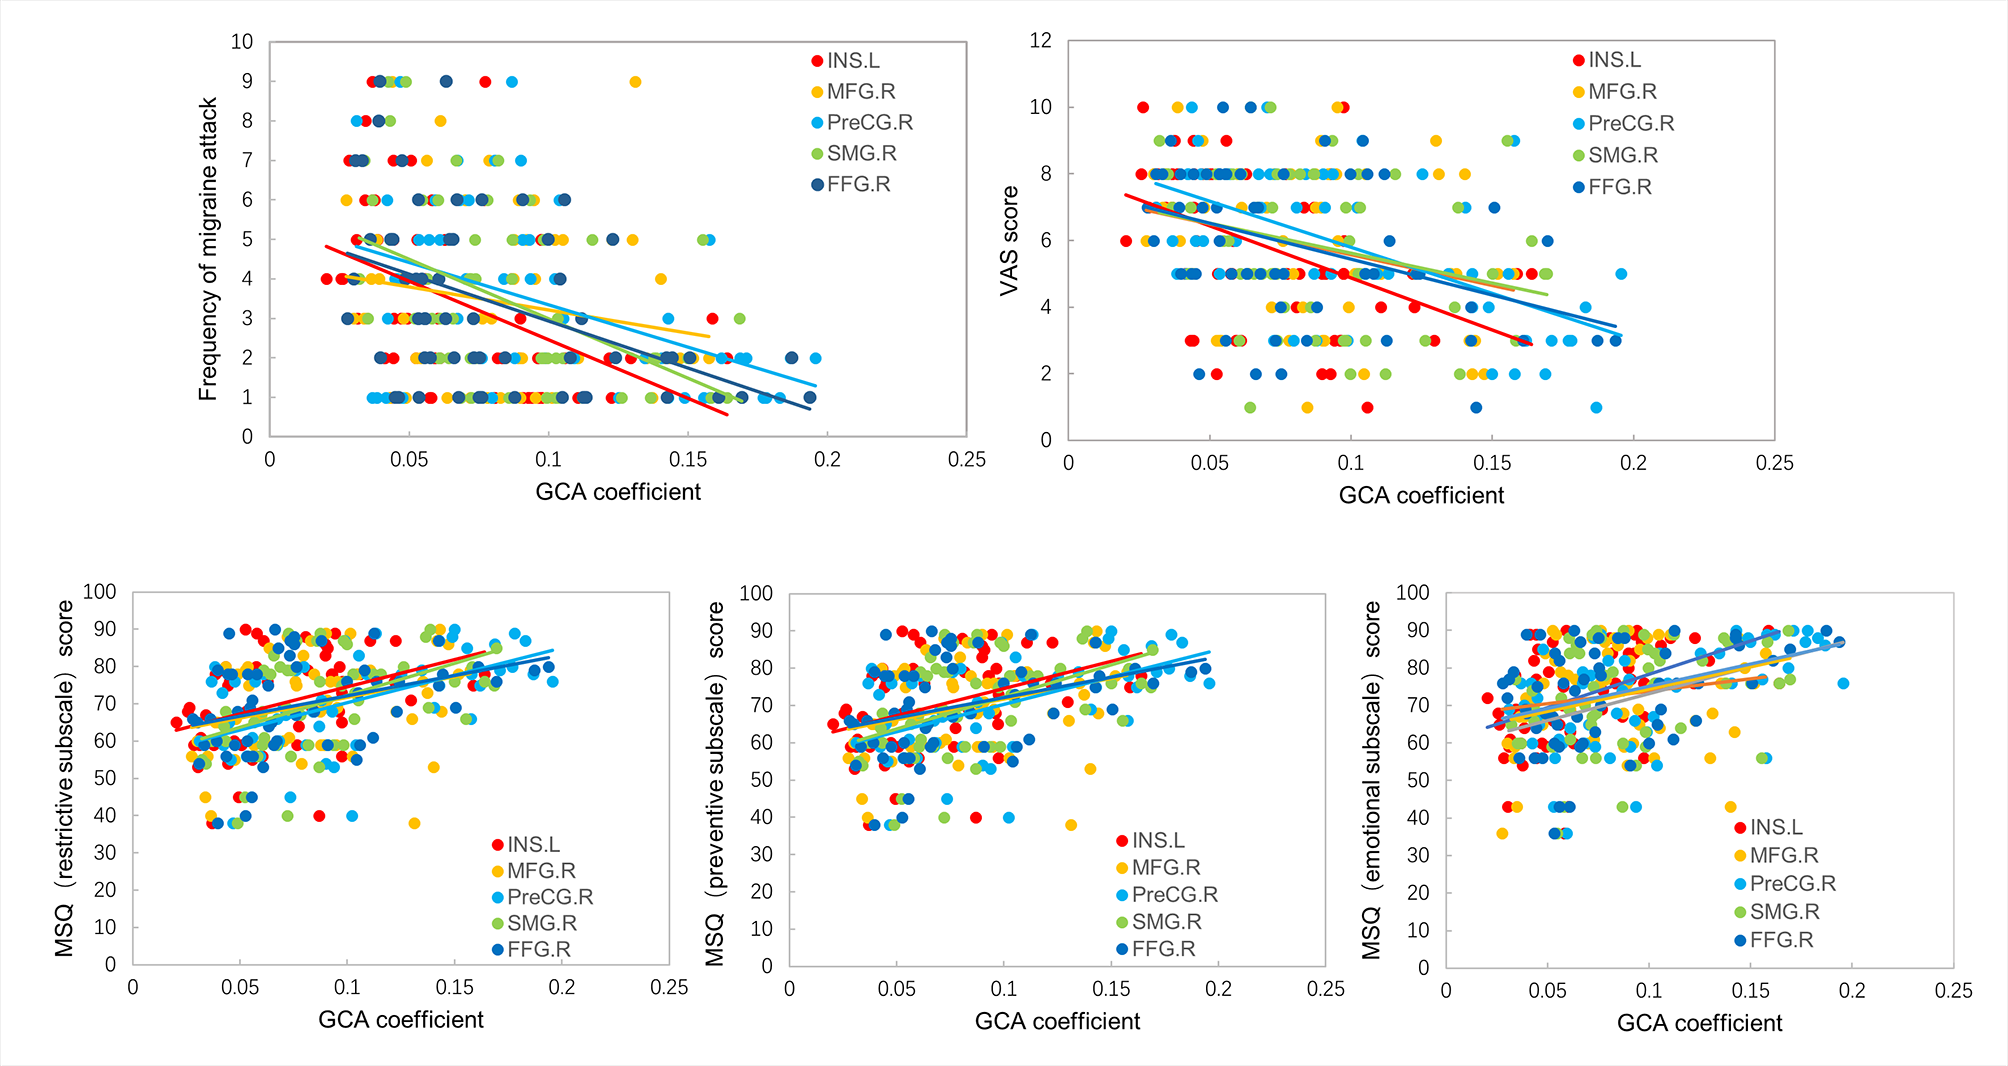


Fig. S2 The significant correlations between clinical variables and values of dynamic GCA coefficient from RVM to the rest of the brain during the different periods of treatment. All abbreviations are defined in the Abbreviations section.

**
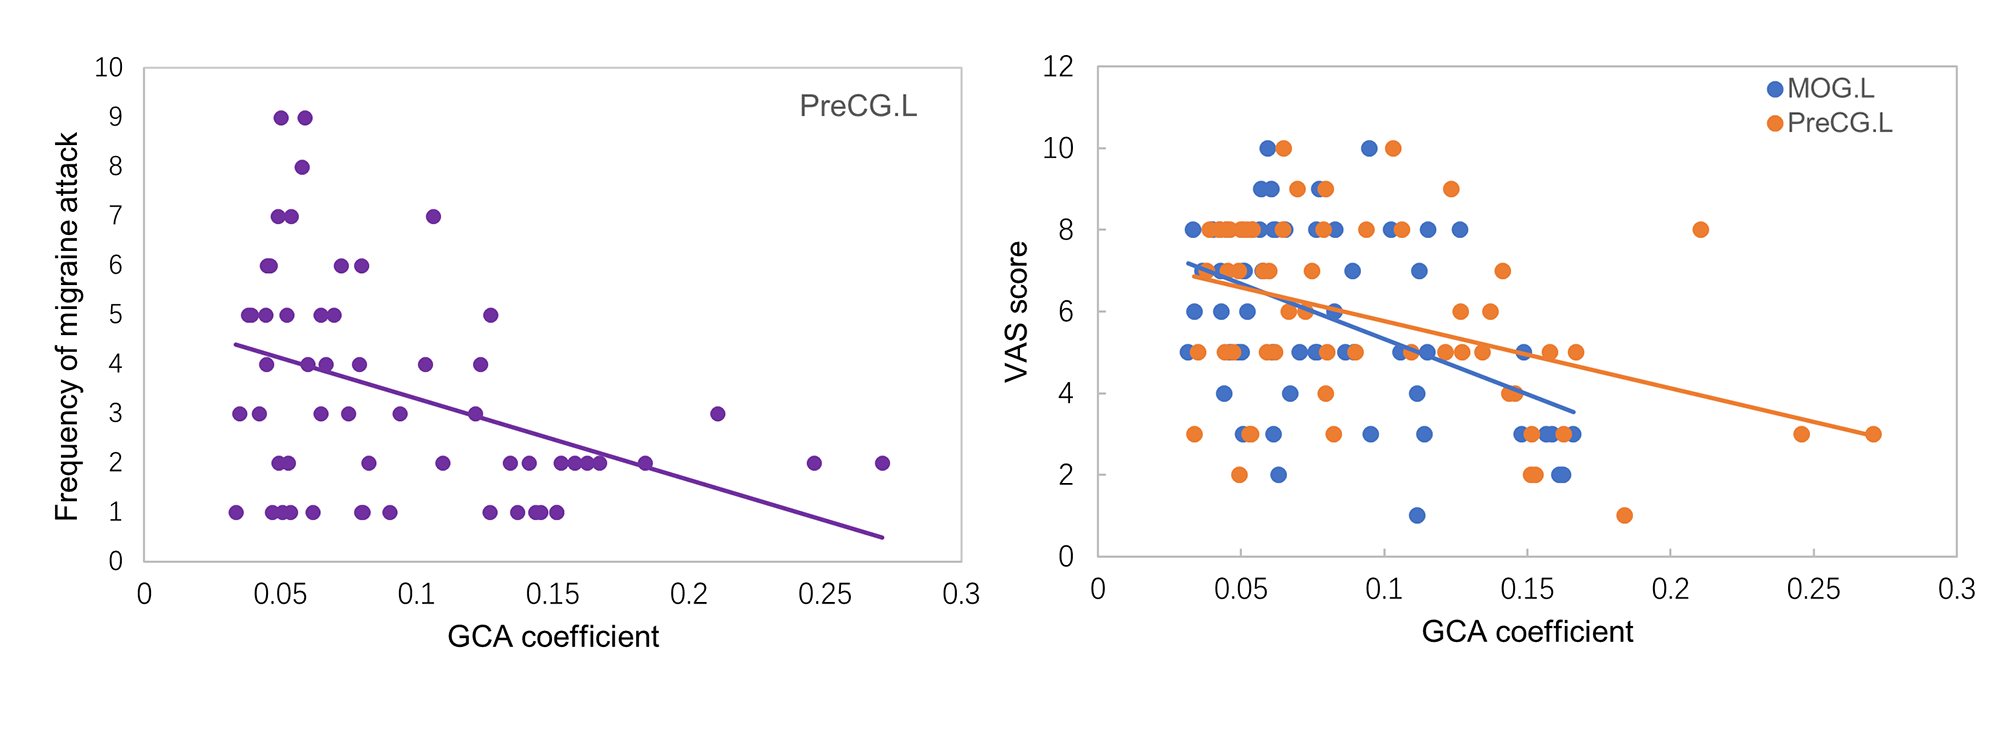
**

Fig. S3 The significant correlations between clinical variables and values of dynamic GCA coefficient from Cerebelum_Crus1_L to the rest of the brain during the different periods of treatment. All abbreviations are defined in the Abbreviations section.

**
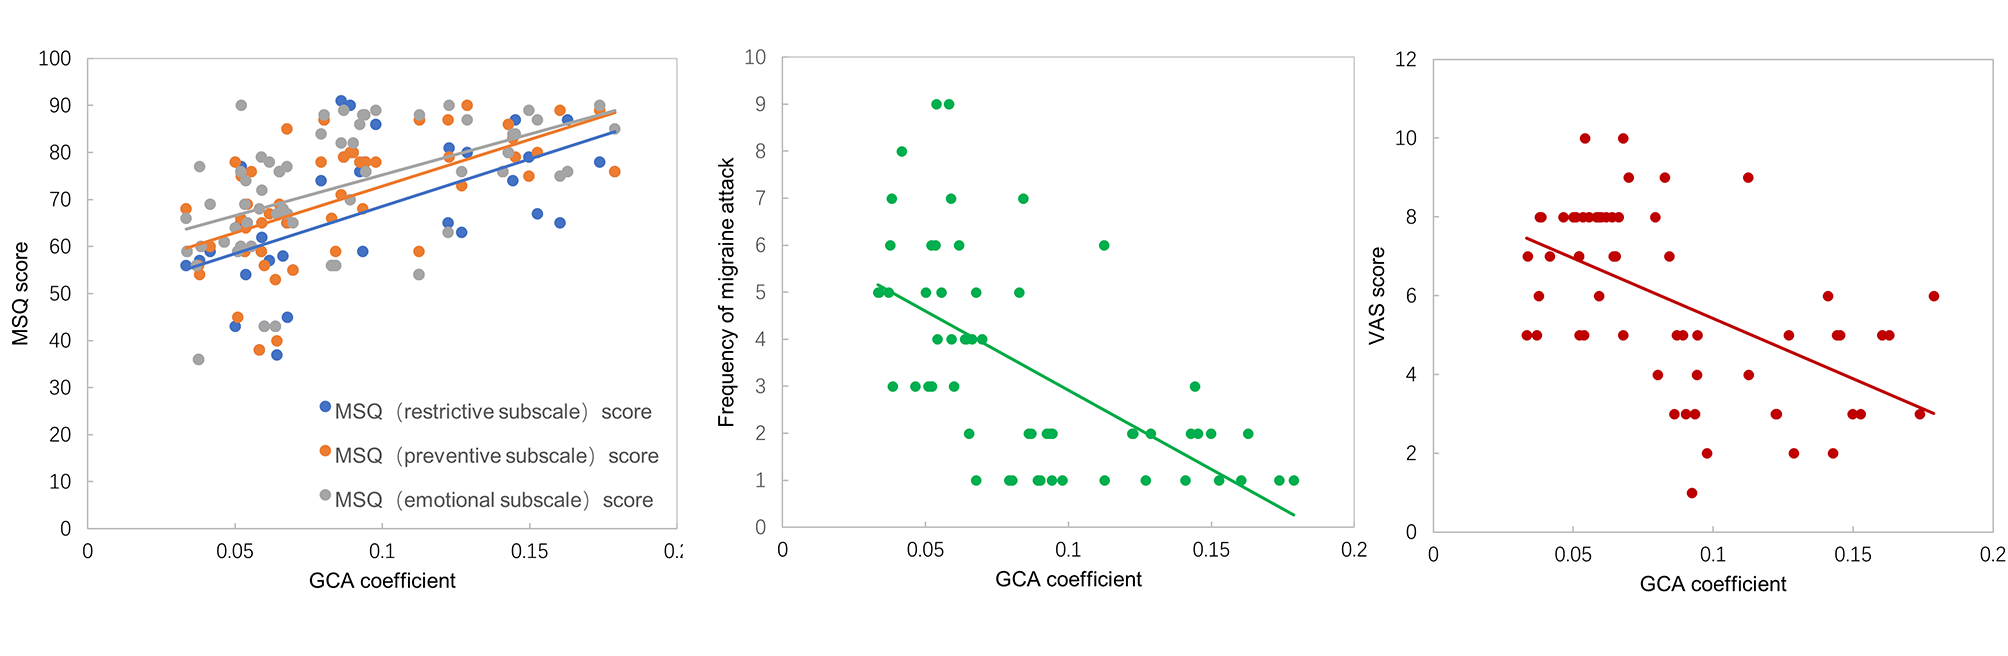
**

Fig. S4 The significant correlations between clinical variables and values of dynamic GCA coefficient from PCUN.R to the rest of the brain during the different periods of treatment. All abbreviations are defined in the Abbreviations section.

**
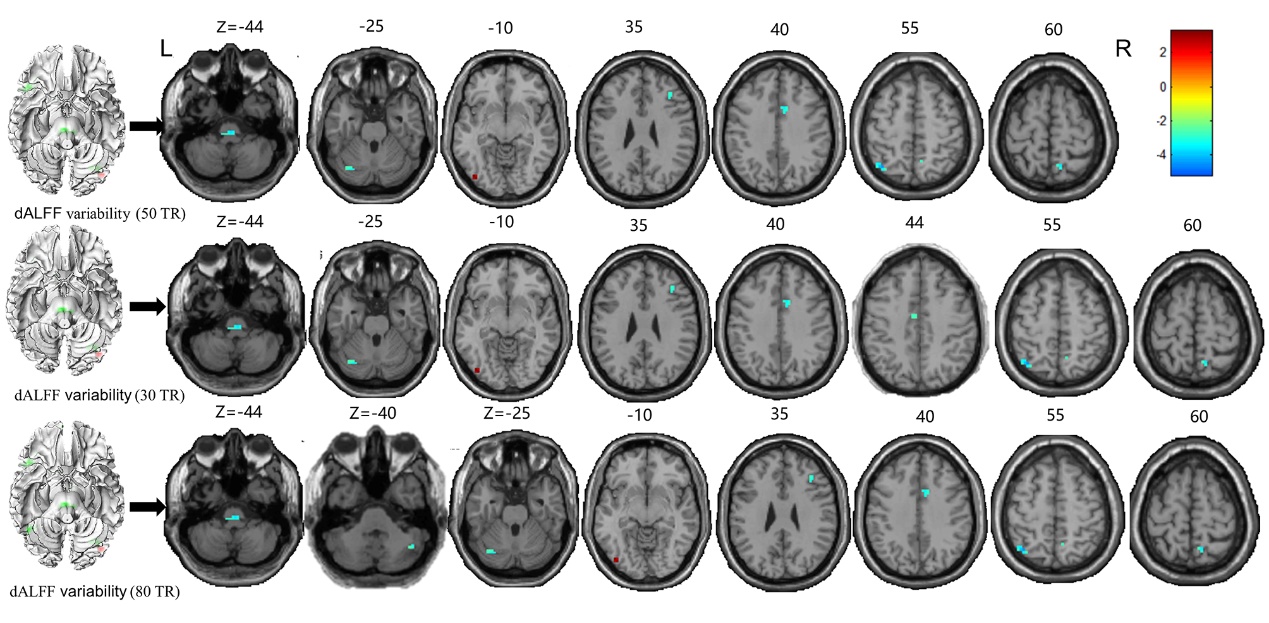
**

Fig. S5. Reproducibility results of the dALFF variability significantly at baseline in different sliding-window length. All abbreviations are defined in the Abbreviations section.

**
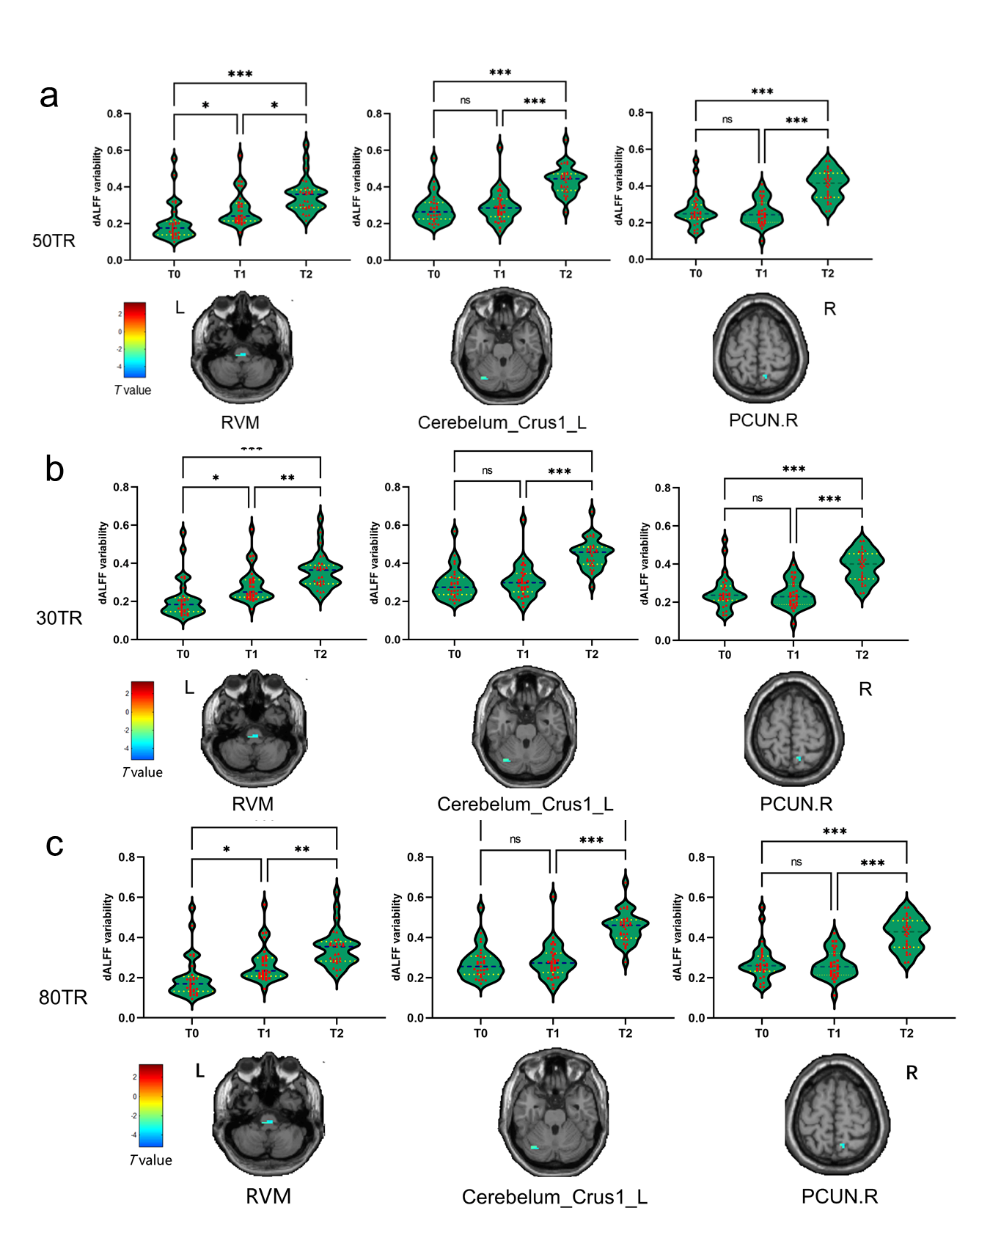
**

Fig. S6. Reproducibility results of the dALFF variability significantly during the different periods of treatment in different sliding-window length. T0: the time point at baseline; T1: the time point after the first acupuncture session; T2: the time point after the 12th acupuncture sessions. All abbreviations are defined in the Abbreviations section.

**
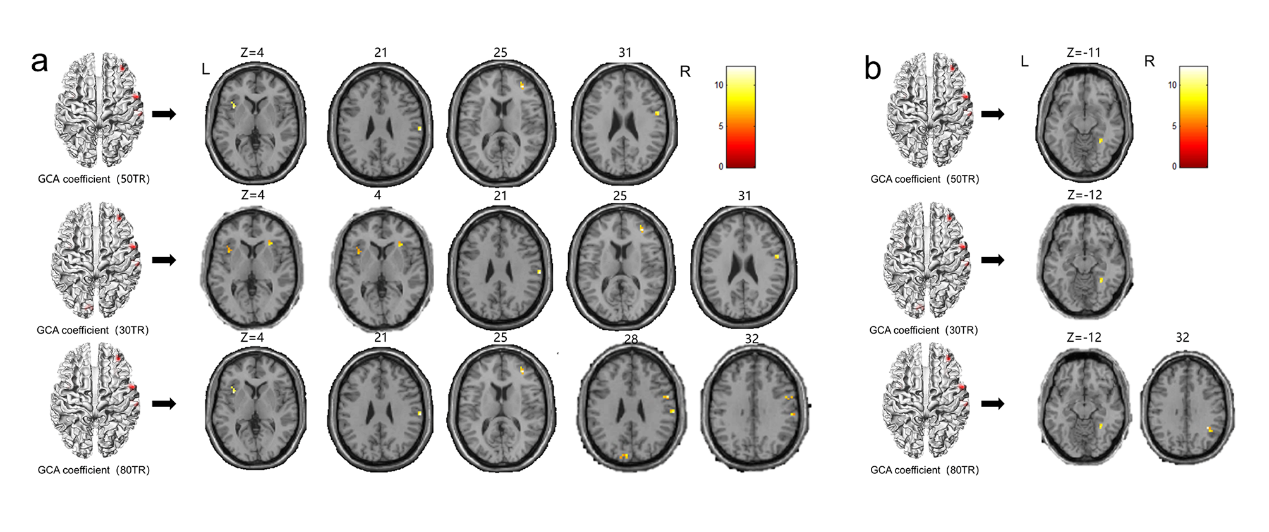
**

Fig. S7. Reproducibility results of abnormal effective connectivity from the RVM to other regions (a) and from the other brain regions to RVM (b) during the different periods of treatment in different sliding-window length. All abbreviations are defined in the Abbreviations section.

**
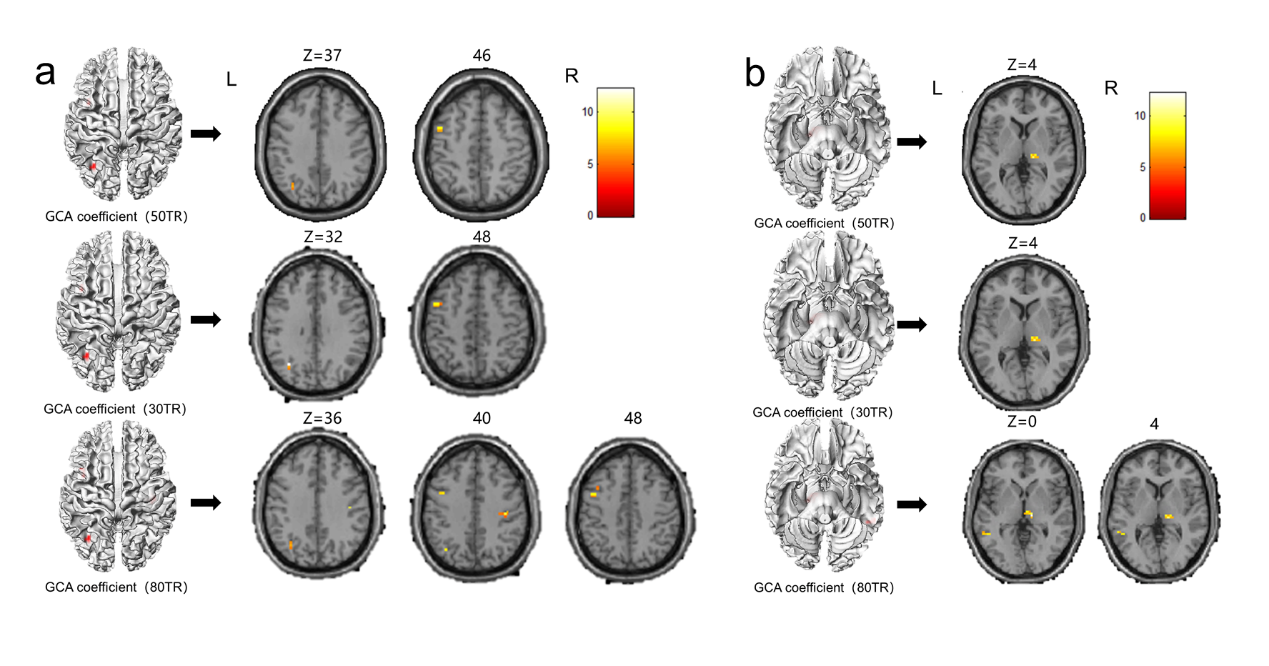
**

Fig. S8. Reproducibility results of abnormal effective connectivity pathways associated with the Cerebelum_Crus1_L (a) and PCUN.R (b) during the different periods of treatment in different sliding-window length. All abbreviations are defined in the Abbreviations section.
